# Supplementary material for: 3D bioprinted CRC model brings to light the replication necessity of an oncolytic vaccinia virus encoding FCU1 gene to exert an efficient anti-tumoral activity
Source: Frontiers journal article supplement (doi:10.3389/fonc.2024.1384499), 2024-07-18

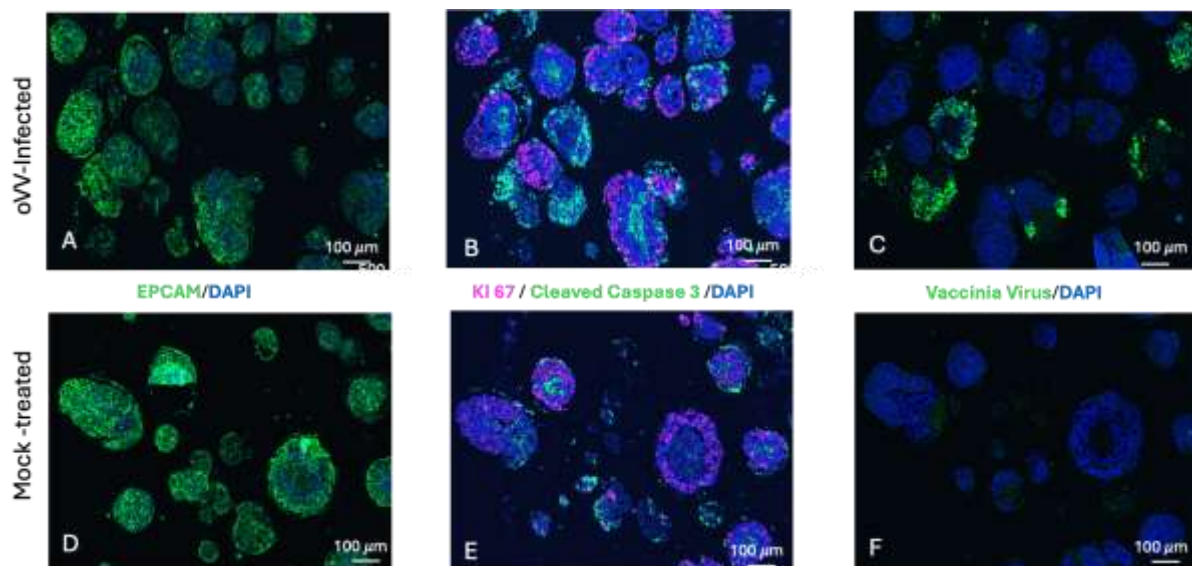

Supplement: Image_2.pdf [file Image_2.pdf]
